# Supplementary material for: Working cancer survivors’ physical and mental characteristics compared to cancer-free workers in Japan: a nationwide general population-based study
Source: Springer Nature journal article supplement (doi:10.1007/s11764-020-00984-7), 2021-01-12
Supplement: 11764_2020_984_MOESM1_ESM.pdf [file 11764_2020_984_MOESM1_ESM.pdf]

**Supplementary Table 1.** Occupation of working cancer survivors and cancer-free workers according to sex, JPHC-NEXT Study, 2011 – 2016, Japan

| Characteristic                       | Men (n = 28,311)                      |                                     |         | Women (n = 26,068)                      |                                     |         |
|--------------------------------------|---------------------------------------|-------------------------------------|---------|-----------------------------------------|-------------------------------------|---------|
|                                      | Working cancer survivors<br>(n = 977) | Cancer-free workers<br>(n = 27,334) | p-value | Working cancer survivors<br>(n = 1,267) | Cancer-free workers<br>(n = 24,801) | p-value |
| <b>Occupation</b>                    |                                       |                                     |         |                                         |                                     |         |
| Professional/technical work          | 203 (20.8)*                           | 6,619 (24.2)                        | <0.001  | 316 (24.9)                              | 6,117 (24.7)                        | 0.481   |
| Administrative work                  | 145 (14.8)                            | 3,762 (13.8)                        |         | 43 (3.4)                                | 699 (2.8)                           |         |
| Clerk                                | 69 (7.1)                              | 2,057 (7.5)                         |         | 206 (16.3)                              | 4,590 (18.5)                        |         |
| Sales                                | 53 (5.4)                              | 1,537 (5.6)                         |         | 106 (8.4)                               | 1,794 (7.2)                         |         |
| Service                              | 99 (10.1)                             | 2,975 (10.9)                        |         | 263 (20.8)                              | 4,887 (19.7)                        |         |
| Security                             | 17 (1.7)                              | 354 (1.3)                           |         | 1 (0.1)                                 | 11 (0.0)                            |         |
| Agriculture/fishery                  | 189 (19.3)***                         | 3,685 (13.5)                        |         | 130 (10.3)                              | 2,490 (10.0)                        |         |
| Transportation or telecommunications | 56 (5.7)                              | 1,594 (5.8)                         |         | 6 (0.5)                                 | 153 (0.6)                           |         |
| Industrial operation/management      | 109 (11.2)                            | 3,611 (13.2)                        |         | 143 (11.3)                              | 2,956 (11.9)                        |         |
| Others                               | 32 (3.3)                              | 882 (3.2)                           |         | 47 (3.7)                                | 934 (3.8)                           |         |
| Dedicated to two or more Occupations | 5 (0.5)                               | 258 (0.9)                           |         | 6 (0.5)                                 | 170 (0.7)                           |         |

Figures are presented as the number and proportion (%).

\* and \*\*\* indicate p-values of less than 0.05 and 0.001, respectively, by residual analysis.
